# Supplementary material
Source: Research Square preprint supplement (doi:10.21203/rs.3.rs-9023219/v1)
Supplement: Supplementary file 1 [file ff9af542125ac3fd4a4ab3ce.docx]

**CT values of the most common three pathogens**

| **Pathogen, CT GRUOP** | **Remission, n (%)** | **Active, n (%)** | **P value** |
| --- | --- | --- | --- |
| **EPEC** | | | |
| CT ≤26 | 22 (73,3) | 3(50) | 0,343 |
| CT >26 | 8 (26,7) | 3(50) |
| ***Campylobacter* spp.** | | | |
| CT ≤26 | 11 (61,1) | 3 (50) | 0,665 |
| CT >26 | 7 (38,9) | 3 (50) |
| **EAEC** | | | |
| CT ≤26 | 7 (87,5) | 0 | n/a |
| CT >26 | 1 (12,5) | 0 |
